# Supplementary material for: Molecular simulations and understanding of antifouling zwitterionic polymer brushes
Source: Royal Society of Chemistry journal article supplement (doi:10.1039/d0tb00520g), 2020-01-01
Supplement: d0tb00520g1.pdf [file d0tb00520g1.pdf]

## SUPPORTING INFORMATION

### **Molecular Simulations and Understanding of Antifouling Zwitterionic Polymer Brushes**

Yonglan Liu<sup>1¶</sup>, Dong Zhang<sup>1¶</sup>, Baiping Ren<sup>1</sup>, Xiong Gong<sup>2</sup>, Lijian Xu<sup>3</sup>, Zhang-Qi Feng<sup>4</sup>, Yung Chang<sup>5</sup>, Yi He<sup>6</sup>, and Jie Zheng<sup>1,2\*</sup>

<sup>1</sup>Department of Chemical, Biomolecular, and Corrosion Engineering  
The University of Akron, Ohio 44325, USA

<sup>2</sup>Department of Polymer Engineering  
The University of Akron, Ohio 44325, USA

<sup>3</sup>Hunan Key Laboratory of Biomedical Nanomaterials and Devices  
College of Life Science and Chemistry  
Hunan University of Technology, Zhuzhou 412007, P. R. China

<sup>4</sup>School of Chemical Engineering  
Nanjing University of Science and Technology, Nanjing, China, 210094

<sup>5</sup>Department of Chemical Engineering and R&D Center for Membrane Technology  
Chung Yuan Christian University, Taoyuan 320, Taiwan

<sup>6</sup>College of Chemical and Biological Engineering  
Zhejiang University, Hangzhou, Zhejiang 310027, China

¶ The authors contribute equally to this work.

\*Corresponding Author: [zhengj@uakron.edu](mailto:zhengj@uakron.edu)

**Table S1.** Force field parameters of pCBMA, pSBMA, and pMPC in the CHARMM format.

**pCBMA**

| Atom Name | Atom Type | Partial Charge | Epsilon | Rmin/2 |
|-----------|-----------|----------------|---------|--------|
| C1        | CH31      | -0.272         | -0.078  | 2.050  |
| H2        | HGA3      | 0.090          | -0.024  | 1.340  |
| H3        | HGA3      | 0.090          | -0.024  | 1.340  |
| H4        | HGA3      | 0.090          | -0.024  | 1.340  |
| C5        | CGO2      | 0.929          | -0.098  | 1.700  |
| C6        | CH21      | 0.080          | -0.560  | 2.010  |
| H7        | HGA2      | 0.090          | 0.035   | 1.340  |
| H8        | HGA2      | 0.090          | -0.035  | 1.340  |
| C9        | CH24      | -0.10          | -0.055  | 2.175  |
| H10       | HGP5      | 0.250          | -0.046  | 0.700  |
| H11       | HGP5      | 0.250          | -0.046  | 0.700  |
| O12       | OG02      | -0.488         | -0.100  | 1.650  |
| O13       | O2D1      | -0.638         | -0.120  | 1.700  |
| N14       | N3P0      | -0.604         | -0.200  | 1.850  |
| C15       | CH34      | -0.349         | -0.077  | 2.215  |
| H16       | HGP5      | 0.250          | -0.046  | 0.700  |
| H17       | HGP5      | 0.250          | -0.046  | 0.700  |
| H18       | HGP5      | 0.250          | -0.046  | 0.700  |
| C19       | CH24      | -0.094         | -0.055  | 2.175  |
| H20       | HGP5      | 0.250          | -0.046  | 0.700  |
| H21       | HGP5      | 0.250          | -0.046  | 0.700  |
| C22       | CH21      | -0.252         | -0.560  | 2.010  |
| H23       | HGA2      | 0.090          | 0.035   | 1.340  |
| H24       | HGA2      | 0.090          | -0.035  | 1.340  |
| C25       | CH34      | -0.349         | -0.077  | 2.215  |
| H26       | HGP5      | 0.250          | -0.046  | 0.700  |
| H27       | HGP5      | 0.250          | -0.046  | 0.700  |
| H28       | HGP5      | 0.250          | -0.046  | 0.700  |
| C29       | CGO3      | 0.587          | -0.060  | 2.000  |

|     |      |        |        |       |
|-----|------|--------|--------|-------|
| O30 | O2D2 | -0.760 | -0.120 | 1.700 |
| O31 | O2D2 | -0.760 | -0.120 | 1.700 |
| C32 | CH21 | -0.182 | -0.560 | 2.010 |
| H33 | HGA2 | 0.090  | 0.035  | 1.340 |
| H34 | HGA2 | 0.090  | -0.035 | 1.340 |
| C36 | CH01 | -0.058 | -0.032 | 2.000 |

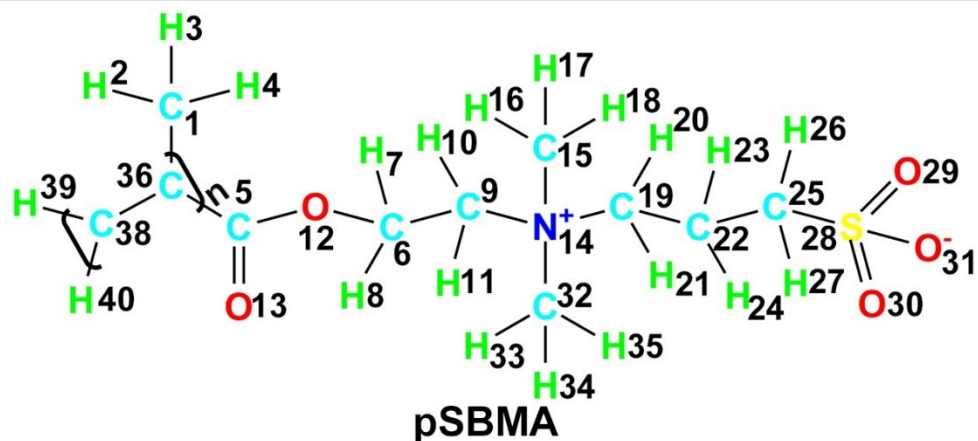

| Atom Name | Atom Type | Partial Charge | Epsilon | Rmin/2 |
|-----------|-----------|----------------|---------|--------|
| C1        | CH31      | -0.272         | -0.078  | 2.050  |
| H2        | HGA3      | 0.09           | -0.024  | 1.340  |
| H3        | HGA3      | 0.09           | -0.024  | 1.340  |
| H4        | HGA3      | 0.09           | -0.024  | 1.340  |
| C5        | CGO2      | 0.929          | -0.098  | 1.700  |
| C6        | CH21      | 0.08           | -0.560  | 2.010  |
| H7        | HGA2      | 0.090          | 0.035   | 1.340  |
| H8        | HGA2      | 0.090          | -0.035  | 1.340  |
| C9        | CH24      | -0.100         | -0.055  | 2.175  |
| H10       | HGP5      | 0.250          | -0.046  | 0.700  |
| H11       | HGP5      | 0.250          | -0.046  | 0.700  |
| O12       | OG02      | -0.488         | -0.100  | 1.650  |
| O13       | O2D1      | -0.638         | -0.120  | 1.700  |
| N14       | N3P0      | -0.597         | -0.200  | 1.850  |
| C15       | CH34      | -0.349         | -0.077  | 2.215  |
| H16       | HGP5      | 0.250          | -0.046  | 0.700  |
| H17       | HGP5      | 0.250          | -0.046  | 0.700  |
| H18       | HGP5      | 0.250          | -0.046  | 0.700  |
| C19       | CH24      | -0.106         | -0.055  | 2.175  |
| H20       | HGP5      | 0.250          | -0.046  | 0.700  |
| H21       | HGP5      | 0.250          | -0.046  | 0.700  |
| C22       | CH21      | -0.179         | -0.560  | 2.010  |
| H23       | HGA2      | 0.090          | 0.035   | 1.340  |
| H24       | HGA2      | 0.090          | -0.035  | 1.340  |
| C25       | CH21      | -0.261         | -0.560  | 2.010  |

|     |      |        |        |       |
|-----|------|--------|--------|-------|
| H26 | HGA2 | 0.090  | 0.035  | 1.340 |
| H27 | HGA2 | 0.090  | -0.035 | 1.340 |
| S28 | S3O1 | 0.730  | -0.470 | 2.100 |
| O29 | O2P1 | -0.550 | -0.120 | 1.700 |
| O30 | O2P1 | -0.550 | -0.120 | 1.700 |
| O31 | O2P1 | -0.550 | -0.120 | 1.700 |
| C32 | CH34 | -0.349 | -0.077 | 2.215 |
| H33 | HGP5 | 0.250  | -0.046 | 0.700 |
| H34 | HGP5 | 0.250  | -0.046 | 0.700 |
| H35 | HGP5 | 0.250  | -0.046 | 0.700 |
| C36 | CH01 | -0.058 | -0.032 | 2.000 |
| C38 | CH21 | -0.182 | -0.560 | 2.010 |
| H39 | HGA2 | 0.090  | 0.035  | 1.340 |
| H40 | HGA2 | 0.090  | -0.035 | 1.340 |

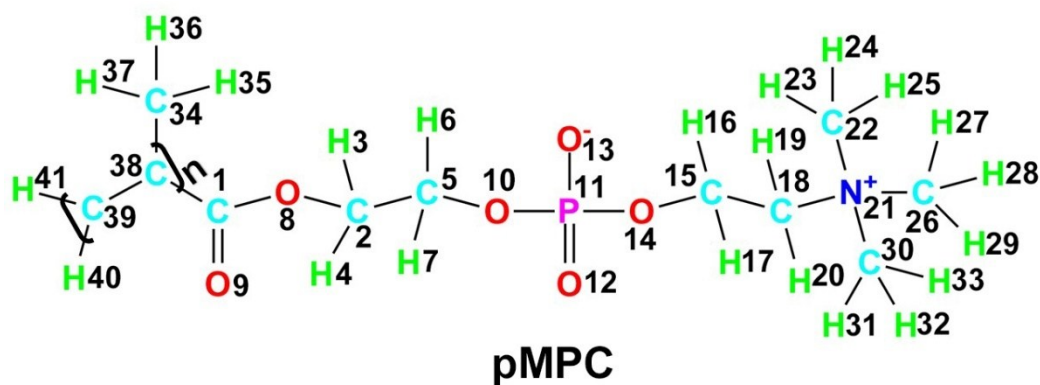

| Atom Name | Atom Type | Partial Charge | Epsilon | Rmin/2 |
|-----------|-----------|----------------|---------|--------|
| C1        | CGO2      | 0.929          | -0.098  | 1.700  |
| C2        | CH21      | 0.08           | -0.560  | 2.010  |
| H3        | HGA2      | 0.09           | 0.035   | 1.340  |
| H4        | HGA2      | 0.09           | -0.035  | 1.340  |
| C5        | CH21      | -0.078         | -0.560  | 2.010  |
| H6        | HGA2      | 0.09           | 0.035   | 1.340  |
| H7        | HGA2      | 0.09           | -0.035  | 1.340  |
| O8        | OG02      | -0.489         | -0.100  | 1.650  |
| O9        | O2D1      | -0.638         | -0.120  | 1.700  |
| O10       | OG03      | -0.57          | -0.100  | 1.650  |
| P11       | PG11      | 1.498          | -0.585  | 2.150  |
| O12       | O2P1      | -0.781         | -0.120  | 1.700  |
| O13       | O2P1      | -0.781         | -0.120  | 1.700  |
| O14       | OG03      | -0.57          | -0.100  | 1.650  |
| C15       | CH21      | -0.078         | -0.560  | 2.010  |
| H16       | HGA2      | 0.09           | 0.035   | 1.340  |
| H17       | HGA2      | 0.09           | -0.035  | 1.340  |
| C18       | CH24      | -0.099         | -0.055  | 2.175  |

|     |      |        |        |       |
|-----|------|--------|--------|-------|
| H19 | HGP5 | 0.25   | -0.046 | 0.700 |
| H20 | HGP5 | 0.25   | -0.046 | 0.700 |
| N21 | N3P0 | -0.604 | -0.200 | 1.850 |
| C22 | CH34 | -0.349 | -0.077 | 2.215 |
| H23 | HGP5 | 0.25   | -0.046 | 0.700 |
| H24 | HGP5 | 0.25   | -0.046 | 0.700 |
| H25 | HGP5 | 0.25   | -0.046 | 0.700 |
| C26 | CH34 | -0.349 | -0.077 | 2.215 |
| H27 | HGP5 | 0.25   | -0.046 | 0.700 |
| H28 | HGP5 | 0.25   | -0.046 | 0.700 |
| H29 | HGP5 | 0.25   | -0.046 | 0.700 |
| C30 | CH34 | -0.349 | -0.077 | 2.215 |
| H31 | HGP5 | 0.25   | -0.046 | 0.700 |
| H32 | HGP5 | 0.25   | -0.046 | 0.700 |
| H33 | HGP5 | 0.25   | -0.046 | 0.700 |
| C34 | CH21 | -0.182 | -0.560 | 2.010 |
| H35 | HGA2 | 0.09   | 0.035  | 1.340 |
| H36 | HGA2 | 0.09   | -0.035 | 1.340 |
| C38 | CH01 | -0.058 | -0.032 | 2.000 |
| C39 | CH31 | -0.272 | -0.078 | 2.050 |
| H40 | HGA3 | 0.09   | -0.024 | 1.340 |
| H41 | HGA3 | 0.09   | -0.024 | 1.340 |
| H42 | HGA3 | 0.09   | -0.024 | 1.340 |
